# ***CoprolD* predicts the source of coprolites and paleofeces using microbiome composition and host DNA content**

**Maxime Borry<sup>1</sup>, Bryan Cordova<sup>1</sup>, Angela Perri<sup>2, 11</sup>, Marsha C. Wibowo<sup>17, 18, 3</sup>, Tanvi Honap<sup>8, 16</sup>, Wing Tung Jada Ko<sup>4</sup>, Jie Yu<sup>5</sup>, Kate Britton<sup>11, 15</sup>, Linus Girdland Flink<sup>15, 19</sup>, Robert C. Power<sup>11, 12</sup>, Ingelise Stuijts<sup>13</sup>, Domingo Salazar Garcia<sup>14</sup>, Courtney A. Hofman<sup>8, 16</sup>, Richard W. Hagan<sup>1</sup>, Thérèse Samdapawindé Kagone<sup>6</sup>, Nicolas Meda<sup>6</sup>, Hélène Carabin<sup>7</sup>, David Jacobson<sup>8, 16</sup>, Karl Reinhard<sup>9</sup>, Cecil M. Lewis, Jr.<sup>8, 16</sup>, Aleksandar Kostic<sup>17, 18, 3</sup>, Choongwon Jeong<sup>1, 20</sup>, Alexander Herbig<sup>1</sup>, Alexander Hübner<sup>1</sup>, and Christina Warinner<sup>1, 4, 10</sup>**

<sup>1</sup>Department of Archaeogenetics, Max Planck Institute for the Science of Human History, Jena, Germany 07745

<sup>2</sup>Department of Archaeology, Durham University, Durham, UK DH13LE

<sup>3</sup>Harvard Medical School, Department of Microbiology, Boston, MA, USA 02215

<sup>4</sup>Department of Anthropology, Harvard University, Cambridge, MA, USA 02138

<sup>5</sup>Department of History, Wuhan University, Wuhan, China

<sup>6</sup>Centre MURAZ, Bobo-Dioulasso, Burkina Faso

<sup>7</sup>Département de pathologie et de microbiologie, Faculté de Médecine vétérinaire-Université de Montréal, Saint-Hyacinthe, Canada, QC J2S 2M2

<sup>8</sup>Department of Anthropology, University of Oklahoma, Norman, OK, USA 73019

<sup>9</sup>School of Natural Resources, University of Nebraska, Lincoln, NE, USA 68583

<sup>10</sup>Faculty of Biological Sciences, Friedrich-Schiller University, Jena, Germany, 07743

<sup>11</sup>Department of Human Evolution, Max Planck Institute for Evolutionary Anthropology, Leipzig, Germany

<sup>12</sup>Institut für Vor- und Frühgeschichtliche Archäologie und Provinzialrömische Archäologie, Ludwig-Maximilians-Universität München, Munich

<sup>13</sup>The Discovery Programme, 6 Mount Street Lower, Dublin 2, Ireland

<sup>14</sup>Grupo de Investigación en Prehistoria IT-1223-19 (UPV-EHU)/IKERBASQUE-Basque Foundation for Science (Vitoria, Spain)

<sup>15</sup>Department of Archaeology, University of Aberdeen, St Mary's Building, Elphinstone Road, Aberdeen, AB24 3UF, UK

<sup>16</sup>Laboratories of Molecular Anthropology and Microbiome Research (LMAMR), University of Oklahoma, Norman, OK, USA 73019

<sup>17</sup>Joslin Diabetes Center, Section on Pathophysiology and Molecular Pharmacology, Boston, MA, USA

<sup>18</sup>Joslin Diabetes Center, Section on Islet Cell and Regenerative Biology, Boston, MA, USA

<sup>19</sup>School of Natural Sciences and Psychology, Liverpool John Moores University, L3 3AF Liverpool, United Kingdom

<sup>20</sup>School of Biological Sciences, Seoul National University, Seoul, South Korea

Corresponding author:

Maxime Borry, Christina Warinner

Email address: [borry@shh.mpg.de](mailto:borry@shh.mpg.de), [warinner@shh.mpg.de](mailto:warinner@shh.mpg.de)

**ABSTRACT**

46 Shotgun metagenomics applied to archaeological feces (paleofeces) can bring new insights into the  
47 composition and functions of human and animal gut microbiota from the past. However, paleofeces often  
48 undergo physical distortions in archaeological sediments, making their source species difficult to identify  
49 on the basis of fecal morphology or microscopic features alone. Here we present a reproducible and  
50 scalable pipeline using both host and microbial DNA to infer the host source of fecal material. We apply  
51 this pipeline to newly sequenced archaeological specimens and show that we are able to distinguish  
52 morphologically similar human and canine paleofeces, as well as non-fecal sediments, from a range of  
53 archaeological contexts.

## 54 INTRODUCTION

55 The gut microbiome, located in the distal colon and primarily studied through the analysis of feces,  
56 is the largest and arguably most influential microbial community within the body (Huttenhower et al.,  
57 2012). Recent investigations of the human microbiome have revealed that it plays diverse roles in  
58 health and disease, and gut microbiome composition has been linked to a variety of human health states,  
59 including inflammatory bowel diseases, diabetes, and obesity (Kho and Lal, 2018). To investigate the gut  
60 microbiome, metagenomic sequencing is typically used to reveal both the taxonomic composition (i.e.,  
61 which bacteria are there) and the functions the microbes are capable of performing (i.e., their potential  
62 metabolic activities) (Sharpton, 2014). Given the importance of the gut microbiome in human health, there  
63 is great interest in understanding its recent evolutionary and ecological history (Warinner and Lewis Jr,  
64 2015; Davenport et al., 2017).

65 Paleofeces, either in an organic or partially mineralized (coprolite) state, present a unique opportunity  
66 to directly investigate changes in the structure and function of the gut microbiome through time (Warinner  
67 et al., 2015). Paleofeces are found in a wide variety of archaeological contexts around the world and are  
68 generally associated with localized processes of desiccation, freezing, or mineralization. Paleofeces can  
69 range in size from whole, intact fecal pieces (Jiménez et al., 2012) to millimeter-sized sediment inclusions  
70 identifiable by their high phosphate and fecal sterol content (Sistiaga et al., 2014). Although genetic  
71 approaches have long been used to investigate dietary DNA found within human (Gilbert et al., 2008;  
72 Poinar et al., 2001) and animal (Poinar et al., 1998; Hofreiter et al., 2000; Bon et al., 2012; Wood et al.,  
73 2016) paleofeces, it is only recently that improvements in metagenomic sequencing and bioinformatics  
74 have enabled detailed characterization of their microbial communities (Tito et al., 2008, 2012; Warinner  
75 et al., 2017).

76 However, before evolutionary studies of the gut microbiome can be conducted, it is first necessary  
77 to confirm the host source of the paleofeces under study. Feces can be difficult to taxonomically assign  
78 by morphology alone (Supplementary Note), and human and canine feces can be particularly difficult to  
79 distinguish in archaeological contexts (Poinar et al., 2009). Since their initial domestication more than  
80 12,000 years ago (Frantz et al., 2016), dogs have often lived in close association with humans, and it is not  
81 uncommon for human and dog feces to co-occur at archaeological sites. Moreover, dogs often consume  
82 diets similar to humans because of provisioning or refuse scavenging (Guiry, 2012), making their feces  
83 difficult to distinguish based on dietary contents. Even well-preserved fecal material degrades over time,  
84 changing in size, shape, and color (Figure 1). The combined analysis of host and microbial ancient DNA  
85 (aDNA) within paleofeces presents a potential solution to this problem.

86 Previously, paleofeces host source has been genetically inferred on the basis of PCR-amplified  
87 mitochondrial DNA sequences alone (Hofreiter et al., 2000); however, this is problematic in the case of  
88 dogs, which, in addition to being pets and working animals, were also eaten by many ancient cultures  
89 (Clutton-Brock and Hammond, 1994; Rosenswig, 2007; Kirch and O'Day, 2003; Podberscek, 2009), and  
90 thus trace amounts of dog DNA may be expected to be present in the feces of humans consuming dogs.  
91 Additionally, dogs often scavenge on human refuse, including human excrement (Butler and Du Toit,  
92 2002), and thus ancient dog feces could also contain trace amounts of human DNA, which could be  
93 further inflated by PCR-based methods.

94 A metagenomics approach overcomes these issues by allowing a quantitative assessment of eukaryotic  
95 DNA at a genome-wide scale, including the identification and removal of modern human contaminant

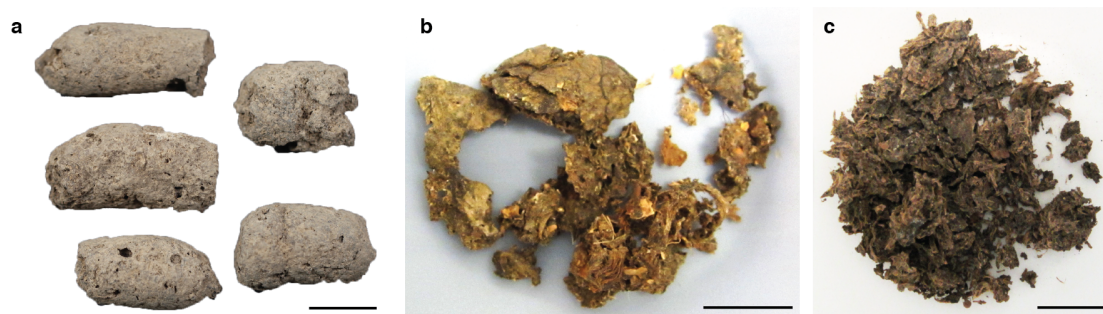

**Figure 1. Examples of archaeological paleofeces analyzed in this study.**

(a) H29-3, from Anhui Province, China, Neolithic period; (b) Zape 2, from Durango, Mexico, ca. 1300 BP; (c) Zape 28, from Durango, Mexico, ca. 1300 BP. Paleofeces ranged from slightly mineralized intact pieces (a) to more fragmentary organic states (b, c), and color ranged from pale gray (a) to dark brown (c). Each scale bar represents 2 cm.

96 DNA that could potentially arise during excavation or subsequent curation or storage. It also allows for the  
97 microbial composition of the feces to be taken into account. Gut microbiome composition differs among  
98 mammal species (Ley et al., 2008), and thus paleofeces microbial composition could be used to confirm and  
99 authenticate host assignment. Available microbial tools, such as SourceTracker (Knights et al., 2011) and  
100 FEAST (Shenhav et al., 2019), can be used to perform the source prediction of microbiome samples from  
101 uncertain sources (sinks) using a reference dataset of source-labeled microbiome samples and, respectively,  
102 Gibbs sampling or an Expectation-Maximization algorithm. However, although SourceTracker has been  
103 widely used for modern microbiome studies and has even been applied to ancient gut microbiome data  
104 (Tito et al., 2012) (Hagan et al., 2019), it was not designed to be a host species identification tool for  
105 ancient microbiomes.

106 In this work we present a bioinformatics method to infer and authenticate the host source of paleofeces  
107 from shotgun metagenomic DNA sequencing data: coproID (**coprolite IDentification**). coproID combines  
108 the analysis of putative host ancient DNA with a machine learning prediction of the feces source based  
109 on microbiome taxonomic composition. Ultimately, coproID predicts the host source of a paleofeces  
110 specimen from the shotgun metagenomic data derived from it. We apply coproID to previously published  
111 modern fecal datasets and show that it can be used to reliably predict their host. We then apply coproID to  
112 a set of newly sequenced paleofeces specimens and non-fecal archaeological sediments and show that  
113 it can discriminate between feces of human and canine origin, as well as between fecal and non-fecal  
114 samples.

## 115 MATERIAL AND METHODS

### 116 Gut microbiome reference datasets

117 Previously published modern reference microbiomes were chosen to represent the diversity of potential pa-  
118 leofeces sources and their possible contaminants, namely human fecal microbiomes from Non-Westernized  
119 Human/Rural (NWHR), and Westernized Human/Urban (WHU) communities, dog fecal microbiomes,  
120 and soil samples (Table 1). Because the human datasets had been filtered to remove human genetic  
121 sequences prior to database deposition, we additionally generated new sequencing data from 118 fecal  
122 specimens from both NWHR and WHU populations (Table S5) in order to determine the average propor-  
123 tion and variance of host DNA in human feces. The Joslin Diabetes Center granted Ethical approval to  
124 sample the WHU individuals. The Centre MURAZ Research Institute granted Ethical approval to sample  
125 the NWHR individuals.

| Metagenome source                        | Food production | N   | Analysis                | Source                                                |
|------------------------------------------|-----------------|-----|-------------------------|-------------------------------------------------------|
| Homo sapiens - USA                       | WHU             | 36  | microbiome              | The Human Microbiome Project Consortium et al. (2012) |
| Homo sapiens - India (Bhopal and Kerala) | WHU & NWHR      | 19  | microbiome              | Dhakan et al. (2019)                                  |
| Homo sapiens - Fiji (agrarian villages)  | NWHR            | 20  | microbiome              | Brito et al. (2019)                                   |
| Homo sapiens - Madagascar                | NWHR            | 110 | microbiome              | Pasolli et al. (2019)                                 |
| Homo sapiens - Brazil (Yanomami)         | NWHR            | 3   | microbiome              | Pasolli et al. (2019)                                 |
| Homo sapiens - Peru (Tunapuco)           | NWHR            | 12  | microbiome              | Obregon-Tito et al. (2015)                            |
| Homo sapiens - Tanzania (Hadza)          | NWHR            | 38  | microbiome              | Rampelli et al. (2015)                                |
| Homo sapiens - Peru (Matses)             | NWHR            | 24  | microbiome              | Obregon-Tito et al. (2015)                            |
| Homo sapiens - USA (Boston)              | WHU             | 49  | host DNA                | This study                                            |
| Homo sapiens - Burkina Faso              | NWHR            | 69  | host DNA                | This study                                            |
| Canis familiaris                         | -               | 150 | microbiome and host DNA | Coelho et al. (2018)                                  |
| Soil                                     | -               | 16  | microbiome              | Fierer et al. (2012)                                  |
| Soil                                     | -               | 2   | microbiome              | CSJR and aromatic plants (2016)                       |
| Soil                                     | -               | 2   | microbiome              | Orellana et al. (2018)                                |

**Table 1. Modern reference microbiome datasets**

126 **Archaeological samples**

127 A total of 20 archaeological samples, originating from 10 sites and spanning periods from 7200 BP to the  
128 medieval era, were selected for this study. Among these 20 samples, of which 17 are newly sequenced, 13  
129 are paleofeces, 4 are midden sediments, and 3 are sediments obtained from human pelvic bone surfaces.  
130 (Table 2).

| Archeological ID | Laboratory ID | Site Name                      | Region   | Period                 | Sample type     | Archaeologically suspected species | Plot ID |
|------------------|---------------|--------------------------------|----------|------------------------|-----------------|------------------------------------|---------|
| Zape 2*          | ZSM002        | Cueva de los Muertos Chiquitos | Mexico   | 1300 BP                | Paleofeces      | HUMAN                              | 01      |
| Zape 5*          | ZSM005        | Cueva de los Muertos Chiquitos | Mexico   | 1300 BP                | Paleofeces      | HUMAN                              | 02      |
| Zape 23          | ZSM023        | Cueva de los Muertos Chiquitos | Mexico   | 1300 BP                | Paleofeces      | HUMAN or CANID                     | 03      |
| Zape 25          | ZSM025        | Cueva de los Muertos Chiquitos | Mexico   | 1300 BP                | Paleofeces      | HUMAN                              | 04      |
| Zape 27          | ZSM027        | Cueva de los Muertos Chiquitos | Mexico   | 1300 BP                | Paleofeces      | HUMAN                              | 05      |
| Zape 28*         | ZSM028        | Cueva de los Muertos Chiquitos | Mexico   | 1300 BP                | Paleofeces      | HUMAN                              | 06      |
| Zape 29          | ZSM029        | Cueva de los Muertos Chiquitos | Mexico   | 1300 BP                | Paleofeces      | HUMAN                              | 07      |
| Zape 31          | ZSM031        | Cueva de los Muertos Chiquitos | Mexico   | 1300 BP                | Paleofeces      | HUMAN                              | 08      |
| H29-1            | AHP001        | Xiaosungang                    | China    | Neolithic 7200-6800 BP | Paleofeces      | CANID or CERVID                    | 09      |
| H35-1            | AHP002        | Xiaosungang                    | China    | Neolithic 7200-6800 BP | Paleofeces      | CANID or CERVID                    | 10      |
| H29-2            | AHP003        | Xiaosungang                    | China    | Neolithic 7200-6800 BP | Paleofeces      | CANID or CERVID                    | 11      |
| H29-3            | AHP004        | Xiaosungang                    | China    | Neolithic 7200-6800 BP | Paleofeces      | CANID or CERVID                    | 12      |
| LG 4560.69       | YRK001        | Surrey                         | UK       | Post-Medieval          | Paleofeces      | HUMAN                              | 13      |
| AP3-C197S163     | DRL001.A      | Derragh                        | Ireland  | Mesolithic             | Midden Sediment | -                                  | 14      |
| AP4-A6-2860      | CBA001.A      | Cabeço das Amoreiras           | Portugal | Mesolithic             | Midden Sediment | -                                  | 15      |
| AP5-798-162      | BRF001.A      | Binchester Roman Fort          | England  | Roman                  | Midden Sediment | -                                  | 16      |
| AP6-LPZ702       | LEI010.A      | Leipzig                        | Germany  | 10th- 11th century AD  | Midden Sediment | -                                  | 17      |
| AP7-6-28353      | ECO004.D      | El Collado                     | Spain    | Mesolithic             | Pelvic Sediment | -                                  | 18      |
| AP8-CMIN-M1      | CMN001.D      | Cingle del Mas Nou             | Spain    | Mesolithic             | Pelvic Sediment | -                                  | 19      |
| AP9-17590        | MLP001.A      | Molpir                         | Slovakia | 7th century BC         | Pelvic Sediment | -                                  | 20      |

\*Metagenomic data were previously published in (Hagan et al., 2019)

**Table 2. Archaeological samples**



## 131 **Sampling**

132 Paleofeces specimens from Mexico were sampled in a dedicated aDNA cleanroom in the Laboratories  
133 for Molecular Anthropology and Microbiome Research (LMAMR) at the University of Oklahoma, USA.  
134 Specimens from China were sampled in a dedicated aDNA cleanroom at the Max Planck Institute for  
135 the Science of Human History (MPI-SHH) in Jena, Germany. All other specimens were first sampled at  
136 the Max Planck Institute for Evolutionary Anthropology (MPI-EVA) in Leipzig, Germany before being  
137 transferred to the MPI-SHH for further processing. Sampling was performed using a sterile stainless  
138 steel spatula or scalpel, followed by homogenization in a mortar and pestle, if necessary. Because the  
139 specimens from Xiaosungang, China were very hard and dense, a rotary drill was used to section the  
140 coprolite prior to sampling. Where possible, fecal material was sampled from the interior of the specimen  
141 rather than the surface. Specimens from Molphir and Leipzig were received suspended in a buffer of  
142 trisodium phosphate, glycerol, and formyl following screening for parasite eggs using optical microscopy.  
143 For each paleofeces specimen, a total of 50-200 mg was analyzed.

144 Modern feces were obtained under written informed consent from Boston, USA (WHU) from a  
145 long-term (>50 years) type 1 diabetes cohort, and from villages in Burkina Faso (NWHR) as part of  
146 broader studies on human gut microbiome biodiversity and health-associated microbial communities.  
147 Feces were collected fresh and stored frozen until analysis. A total of 250 mg was analyzed for each fecal  
148 specimen.

## 149 **DNA Extraction**

150 For paleofeces and sediment samples, DNA extractions were performed using a silica spin column  
151 protocol (Dabney et al., 2013) with minor modifications in dedicated aDNA cleanrooms located at  
152 LMAMR (Mexican paleofeces) and the MPI-SHH (all other paleofeces). At LMAMR, the modifications  
153 followed those of protocol D described in (Hagan et al., 2019). DNA extractions at the MPI-SHH  
154 were similar, but omitted the initial bead-beating step, and a single silica column was used per sample  
155 instead of two. Additionally, to reduce centrifugation errors, DNA extractions performed at the MPI-SHH  
156 substituted the column apparatus from the High Pure Viral Nucleic Acid Large Volume Kit (Roche,  
157 Switzerland) in place of the custom assembled Zymo-reservoirs coupled to MinElute (Qiagen) columns  
158 described in (Dabney et al., 2013). Samples processed at the MPI-SHH were also partially treated with  
159 uracil-DNA-glycosylase (UDG) enzyme to confine DNA damage to the ends of the DNA molecules  
160 (Rohland et al., 2015).

161 For modern feces, DNA was extracted from Burkina Faso fecal samples using the AllPrep PowerViral  
162 DNA/RNA Qiagen kit at Centre MURAZ Research Institute in Burkina Faso. DNA was extracted from  
163 the Boston fecal material using the ZymoBIOMICS DNA Miniprep Kit (D4303) at the Joslin Diabetes  
164 Center.

## 165 **Library preparation and Sequencing**

166 For paleofeces and sediment samples, double-stranded, dual-indexed shotgun Illumina libraries were  
167 constructed following (Meyer and Kircher, 2010) using either the NEBNext DNA Library Prep Master Set  
168 (E6070) kit (Hagan et al., 2019; Mann et al., 2018) for the Mexican paleofeces or individually purchased  
169 reagents (Mann et al., 2018) for all other samples. Following library amplification using Phusion HotStart  
170 II (Mexican paleofeces) or Agilent Pfu Turbo Cx Hotstart (all other paleofeces) polymerase, the libraries  
171 were purified using a Qiagen MinElute PCR Purification kit and quantified using either a BioAnalyzer  
172 2100 with High Sensitivity DNA reagents or an Agilent Tape Station D1000 Screen Tape kit. The Mexican  
173 libraries were pooled in equimolar amounts and sequenced on an Illumina HiSeq 2000 using 2x100  
174 bp paired-end sequencing. All other libraries were pooled in equimolar amounts and sequenced on an  
175 Illumina HiSeq 4000 using 2x75 bp paired-end sequencing.

176 For modern NWHR feces, double-stranded, dual-indexed shotgun Illumina libraries were constructed  
177 in a dedicated modern DNA facility at LMAMR. Briefly, after DNA quantification using a Qubit dsDNA  
178 Broad Range Assay Kit, DNA was sheared using a QSonica Q800R in 1.5mL 4°C cold water at 50%  
179 amplitude for 12 minutes to aim for a fragment size between 400 and 600 bp. Fragments shorter than  
180 150 bp were removed using Sera-Mag SpeedBeads and a Alpaqua 96S Super Magnet Plate. End-repair  
181 and A-tailing was performed using the Kapa HyperPrep EndRepair and A-Tailing Kit, and Illumina  
182 sequencing adapters were added. After library quantification, libraries were dual-indexed in an indexing  
183 PCR over four replicates, pooled, and purified using the SpeedBeads. Libraries were quantified using  
184 the Agilent Fragment Analyzer, pooled in equimolar ratios, and size-selected using the Pippin Prep to

185 a target size range of 400-600 bp. Libraries were sequenced on an Illumina NovaSeq S1 using 2x150  
186 bp paired-end sequencing at the Oklahoma Medical Research Foundation Next-Generation Sequencing  
187 Core facility. Modern WHU libraries were generated using the NEBNext DNA library preparation kit  
188 following manufacturer's recommendations, after fragmentation by shearing for a target fragment size of  
189 350 bp. The libraries were then pooled and sequenced by Novogene on a NovaSeq S4 using 2x150 bp  
190 paired-end sequencing.

### 191 **Proportion of host DNA in gut microbiome**

192 Because it is standard practice to remove human DNA sequences from metagenomics DNA sequence files  
193 before data deposition into public repositories, we were unable to infer the proportion of human DNA  
194 in human feces from publicly available data. To overcome this problem, we measured the proportion  
195 of human DNA in two newly generated fecal metagenomics datasets from Burkina Faso (NWHF) and  
196 Boston, U.S.A. (WHU) (Table S5). To measure the proportion of human DNA in each fecal dataset,  
197 we used the Anonymap pipeline (Borry, 2019a) to perform a mapping with Bowtie 2 (Langmead and  
198 Salzberg, 2012) with the parameters `--very-sensitive -N 1` after adapter cleaning and reads  
199 trimming for ambiguous and low-quality bases with a QScore below 20 by AdapterRemoval v2 (Schubert  
200 et al., 2016). To preserve the anonymity of the donors, the sequences of mapped reads were then replaced  
201 by Ns thus anonymizing the alignment files. We obtained the proportion of host DNA per sample by  
202 dividing the number of mapped reads by the total number of reads in the sample. The proportion of host  
203 DNA in dog feces was determined from the published dataset Coelho et al. (2018) as described above, but  
204 without the anonymization step.

### 205 **coproID pipeline**

206 Data were processed using the coproID pipeline v1.0 (Figure 2) (DOI: 10.5281/zenodo.2653757) written  
207 using Nextflow (Di Tommaso et al., 2017) and made available through nf-core (Ewels et al., 2019).  
208 Nextflow is a Domain Specific Language designed to ensure reproducibility and scalability for scientific  
209 pipelines, and nf-core is a community-developed set of guidelines and tools to promote standardization  
210 and maximum usability of Nextflow pipelines.

211 coproID consists of 5 different steps:

#### 212 **Preprocessing**

213 *Fastq* sequencing files are given as an input. After quality control analysis with FastQC (Andrews et al.,  
214 2010), raw sequencing reads are cleaned from sequencing adapters and trimmed from ambiguous and  
215 low-quality bases with a QScore below 20, while reads shorter than 30 base pairs are discarded using  
216 AdapterRemoval v2. By default, paired-end reads are merged on overlapping base pairs.

#### 217 **Mapping**

218 The preprocessed reads are then aligned to each of the target species genomes (source species) by Bowtie2  
219 with the `--very-sensitive` preset while allowing for a mismatch in the seed search (`-N 1`).

220 When running coproID with the ancient DNA mode (`--adna`), alignments are filtered by PMDtools  
221 (Skoglund et al., 2014) to only retain reads showing post-mortem damages (PMD). PMDtools default  
222 settings are used, with specified library type, and only reads with a PMDScore greater than three are kept.

#### 223 **Computing host DNA content**

224 Next, filtered alignments are processed in Python using the Pysam library (pysam developers, 2018).  
225 Reads matching above the identity threshold of 0.95 to multiple host genomes are flagged as common  
226 reads  $reads_{commons}$  whereas reads mapping above the identity threshold to a single host genome are  
227 flagged as genome-specific host reads  $reads_{spec\ g}$  to each genome  $g$ . Each source species host DNA is  
228 normalized by genome size and gut microbiome host DNA content such as:

$$229 \text{NormalizedHostDNA}(\text{source species}) = \frac{\sum \text{length}(reads_{spec\ g})}{genome_g \text{ length} \cdot endo_g} \quad (1)$$

230 where for each species of genome  $g$ ,  $\sum \text{length}(reads_{spec\ g})$  is the total length of all  $reads_{spec\ g}$ ,  
231  $genome_g \text{ length}$  is the size of the genome, and  $endo_g$  is the host DNA proportion in the species gut  
232 microbiome.



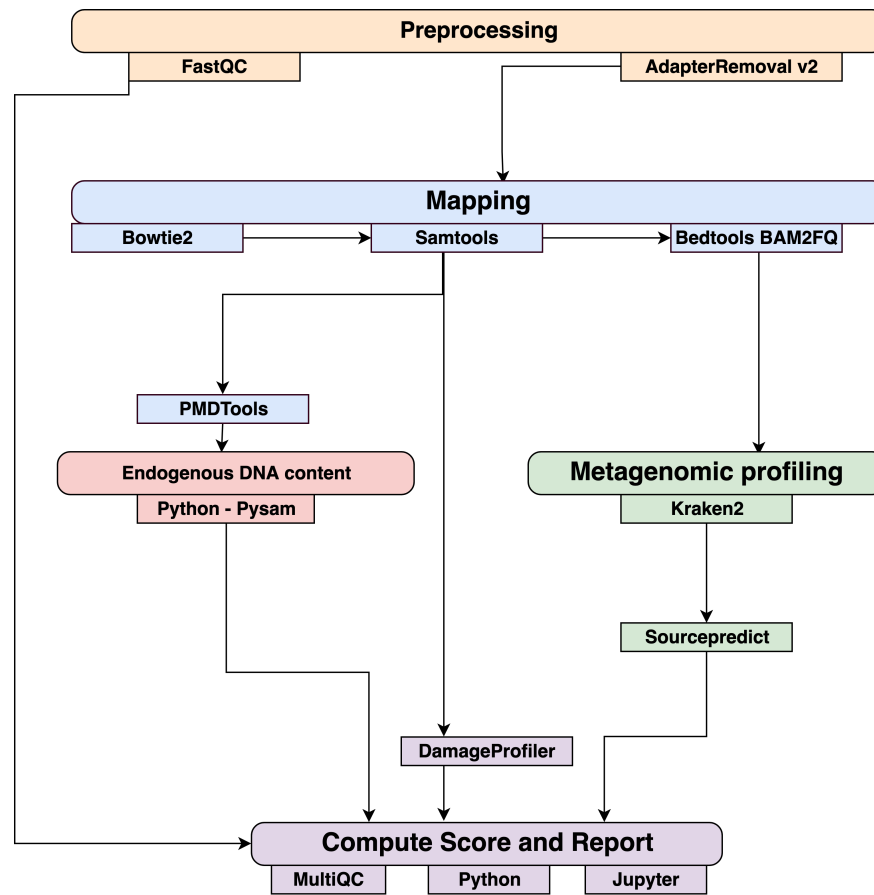

**Figure 2. Workflow schematic of the coproID pipeline.**

coproID consists of five steps: *Preprocessing* (orange), *Mapping* (blue), *Computing host DNA content for each metagenome* (red), *Metagenomic profiling* (green), and *Reporting* (violet). Individual programs (squared boxes) are colored by category (rounded boxes)

232 Afterwards, an host DNA ratio is computed for each source species such as:

$$233 \quad \text{NormalizedRatio}(\text{source species}) = \frac{\text{NormalizedHostDNA}(\text{source species})}{\sum \text{NormalizedHost DNA}(\text{source species})} \quad (2)$$

233 where  $\sum \text{NormalizedHost DNA}(\text{source species})$  is the sum of all source species Normalized Host  
234 DNA.

### 235 **Metagenomic profiling**

236 Adapter clipped and trimmed reads are given as an input to Kraken 2 (Wood and Salzberg, 2014). Using  
237 the MiniKraken2\_v2\_8GB database (2019/04/23 version), Kraken 2 performs the taxonomic classification  
238 to output a taxon count per sample report file. All samples taxon count are pooled together in a taxon  
239 counts matrix with samples in columns, and taxons in rows. Next, Sourcepredict (Borry, 2019b) is used  
240 to predict the source based on each microbiome sample taxon composition. Using dimension reduction and  
241 K-Nearest Neighbors (KNN) machine learning trained with reference modern gut microbiomes samples  
242 (Table 1), Sourcepredict estimates a proportion  $\text{prop}_{\text{microbiome}}(\text{source species})$  of each potential source  
243 species, here Human or Dog, for each sample.

### 244 **Reporting**

For each filtered alignment file, the DNA damage patterns are estimated with DamageProfiler (Peltzer and Neukamm, 2019). The information from the host DNA content and the metagenomic profiling are

gathered for each source in each sample such as:

$$proportion(source\ species) = NormalizedRatio(source\ species) \cdot prop_{microbiome}(source\ species)$$

245 Finally, a summary report is generated including the damage plots, a summary table of the coproID  
246 metrics, and the embedding of the samples in two dimensions by Sourcepredict. coproID is available on  
247 GitHub at the following address: [github.com/nf-core/coproID](https://github.com/nf-core/coproID).

## 248 RESULTS

249 We analyzed 21 archaeological samples with coproID v1.0 to estimate their source using both host DNA  
250 and microbiome composition.

### 251 Host DNA in reference gut microbiomes

252 Before analyzing the archaeological samples, we first tested whether there is a per-species difference in  
253 host DNA content in modern reference human and dog feces. With Anonymap, we computed the amount  
254 of host DNA in each reference gut microbiome (Table S1). We found that the median percentages of  
255 host DNA in NWHR, WHU, and Dog (Figure 3) are significantly different at  $\alpha = 0.05$  (Kruskal-  
256 Wallis H-test = 117.40, p value < 0.0001). We confirmed that there is a significant difference of median  
257 percentages of host DNA between dogs and NWHR, as well as dogs and WHU, with Mann-Whitney U  
258 tests (Table 3) and therefore corrected each sample by the mean percentage of gut host DNA found in  
259 each species, 1.24% for humans ( $\mu_{NWHR} = 0.85$ ,  $\sigma_{NWHR} = 2.33$ ,  $\mu_{WHU} = 1.67$ ,  $\sigma_{WHU} = 0.81$ ), and 0.11%  
260 for dogs ( $\sigma_{dog} = 0.16$ ) (equation 1, table S1). This information was used to correct for the amount of host  
261 DNA found in paleofeces.

| Comparison   | Mann–Whitney U test | p value  |
|--------------|---------------------|----------|
| Dog vs NWHR  | 3327.0              | < 0.0001 |
| Dog vs WHU   | 41.0                | < 0.0001 |
| NWHR vs WHU  | 370.0               | < 0.0001 |
| Dog vs Human | 3368.0              | < 0.0001 |

**Table 3.** Statistical comparison of reference gut host DNA content. Mann–Whitney U test for independent observations.  $H_0$ : the distributions of both populations are equal.

### 262 The effect of PMD filtering on host species prediction

263 Because aDNA accumulates damage over time (Briggs et al., 2007), we could use this characteristic to  
264 filter for reads carrying these specific damage patterns using PMDtools, and therefore reduce modern  
265 contamination in the dataset. We applied PMD filtering to our archaeological datasets, and for each,  
266 compared the predicted host source before and afterwards. The predicted host sources did not change after  
267 the DNA damage read filtering, but some became less certain (Figure 4). Most samples are confidently  
268 assigned to one of the two target species, however some samples previously categorized as humans now lie  
269 in the uncertainty zone. This suggests that PMDtools filtering lowered the modern human contamination  
270 which might have originated from sample excavation and manipulation.

271 The trade-off of PMDtools filtering is that it reduces the assignment power by lowering the number  
272 of reads available for host DNA based source prediction by only keeping PMD-bearing reads. This  
273 loss is greater for well-preserved samples, which may have relatively few damaged reads (< 15% of  
274 total). Ultimately, applying damage filtering can make it more difficult to categorize samples on the sole  
275 basis of host DNA content, but it also makes source assignments more reliable by removing modern  
276 contamination.

### 277 Source microbiome prediction of reference samples by Sourcepredict

278 To help resolve ambiguities related to the host aDNA present within a sample, we also investigated gut  
279 microbiome composition as an additional line of evidence to better predict paleofeces source. After  
280 performing taxonomic classification using Kraken2, we computed a sample pairwise distance matrix from  
281 the species counts. With the t-SNE dimension reduction method, we embedded this distance matrix in

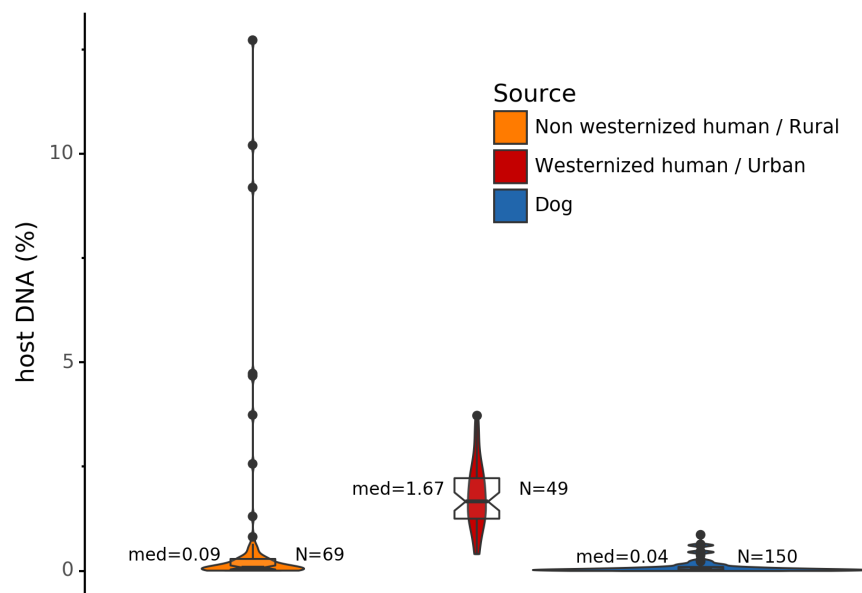

**Figure 3. Gut microbiome host DNA content.**

The median percentage of host DNA in the gut microbiome and the number of samples in each group are displayed besides each boxplot.

282 two dimensions to visualize the sample positions and sources (Figure 5a). We then used a KNN machine  
283 learning classifier on this low dimension embedding to predict the source of gut microbiome samples.  
284 This trained KNN model reached a test accuracy of 0.94 on previously unseen data (figure 5b).

### 285 **Embedding of archaeological samples by Sourcepredict**

286 We used this trained KNN model to predict the sources of the 20 paleofeces and coprolite archaeological  
287 samples, after embedding them in a two-dimensional space (Figure 6). Based on their microbiome  
288 composition data, Sourcepredict predicted 2 paleofeces samples as dogs, 8 paleofeces samples as human,  
289 2 paleofeces samples and 4 archaeological sediments as soil, while the rest were predicted as unknown  
290 (Table S2).

### 291 **coproID prediction**

292 Combining both PMD-filtered host DNA information and microbiome composition, coproID was able  
293 to reliably categorize 7 of the 13 paleofeces samples, as 5 human paleofeces and 2 canine paleofeces,  
294 whereas all of the non-fecal archaeological sediments were flagged as unknown. (Figure 8). This  
295 confirms the original archaeological source hypothesis for five samples (ZSM005, ZSM025, ZSM027,  
296 ZSM028, ZSM031) and specifies or rejects the original archaeological source hypothesis for the two  
297 others (YRK001, AHP004). The 6 paleofeces samples not reliably identified by coproID have a conflicting  
298 source proportion estimation between host DNA and microbiome composition (Figure 7a and 7b and  
299 Table S3). Specifically, paleofeces AHP001, AHP002, and AHP003 show little predicted gut microbiome  
300 preservation, and thus have likely been altered by taphonomic (decomposition) processes. Paleofeces  
301 ZSM002, ZSM023, and ZSM029, by contrast, show good evidence of both host and microbiome  
302 preservation, but have conflicting source predictions based on host and microbiome evidence. Given that  
303 subsistence is associated with gut microbiome composition, this conflict may be related to insufficient gut  
304 microbiome datasets available for non-Westernized dog populations (Hagan et al., 2019).

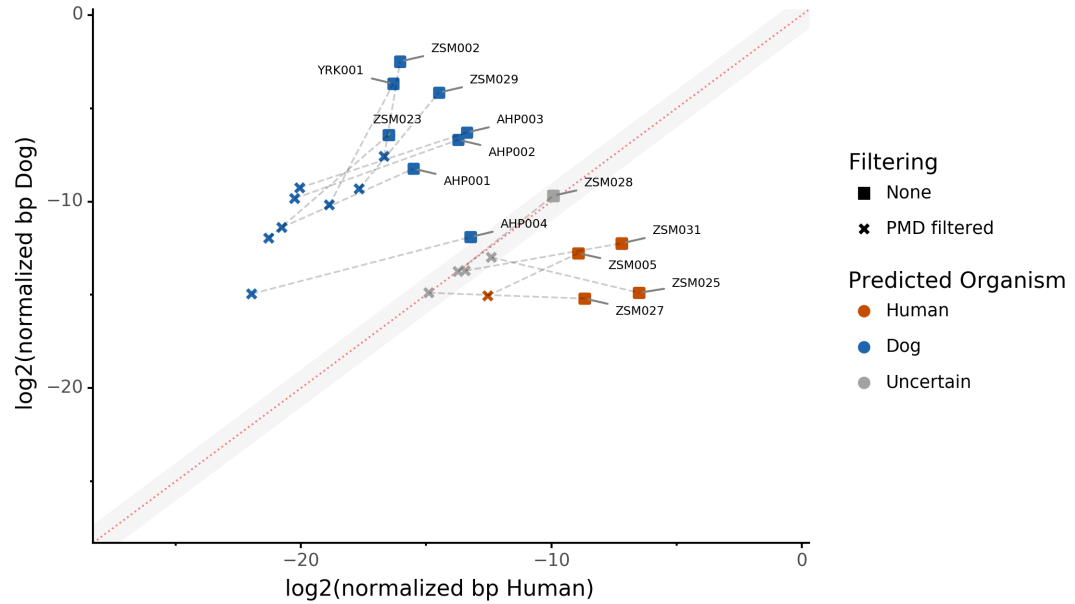

**Figure 4. The effect of filtering for damaged reads using PMD.**

The  $\log_2$  of the human *NormalizedHostDNA* is graphed against the  $\log_2$  of the dog *NormalizedHostDNA*. Squares represent samples before filtering by PMD, whereas crosses represent samples after filtering by PMD. Dotted lines show the correspondence between samples. The red diagonal line marks the boundary between the two species, and the grey shaded area indicates a zone of species uncertainty ( $\pm 1 \log_2FC$ ) due to insufficient genetic information.

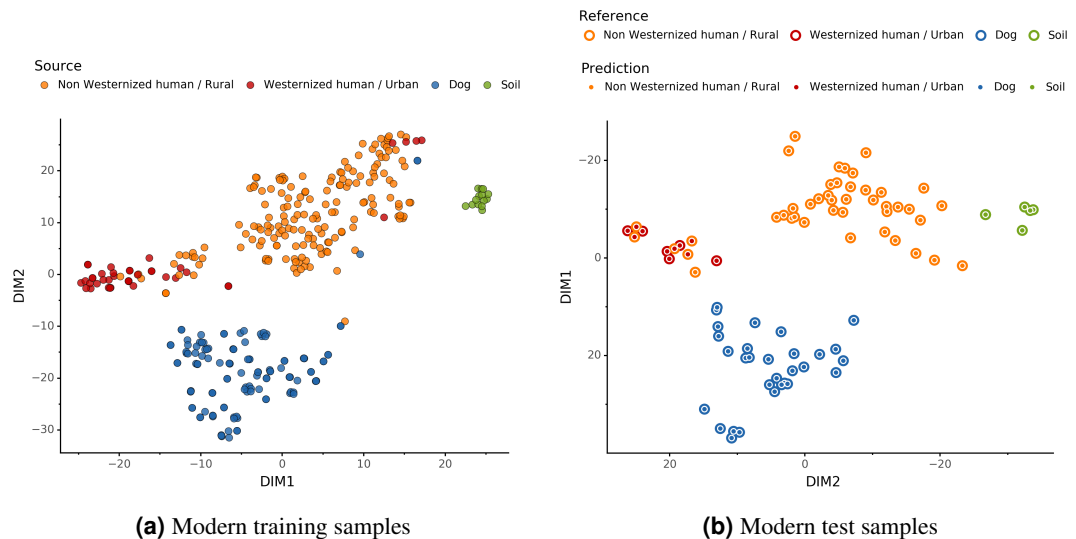

**Figure 5. Embedding of reference modern gut microbiomes.**

(a) t-SNE embedding of the species composition based on sample pairwise Weighted Unifrac distances for training modern gut microbiomes training samples. Samples are colored by their actual source. (b) t-SNE embedding of the species composition based on sample pairwise Weighted Unifrac distances for source prediction of modern test samples. The outer circle color is the actual source of a sample, while the inner circle color is the predicted sample source by Sourcepredict.

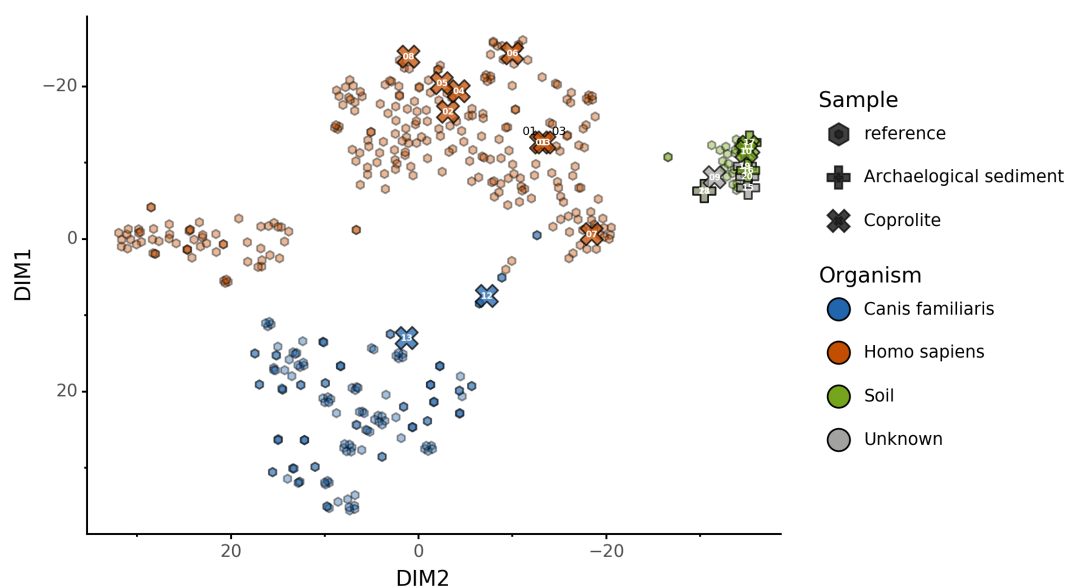

**Figure 6. Prediction of archaeological samples sources and t-SNE embedding by Sourcepredict.** t-SNE embedding of archaeological (crosses) and modern (hexagons) samples. The color of the modern samples is based on their actual source while the color of the archaeological samples is based on their predicted source by Sourcepredict. Archaeological sample are labelled with their *Plot ID* (Table 2).

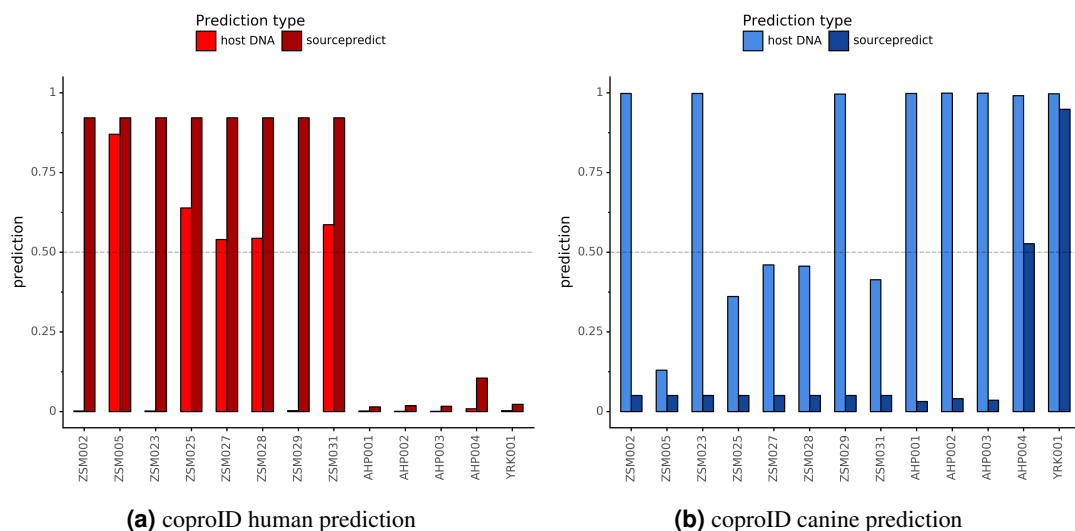

**Figure 7. Host DNA and Sourcepredict source prediction for paleofeces samples.** The vertical bar represents the predicted proportion by host DNA (lighter fill) or by Sourcepredict (darker fill). The horizontal dashed line represents the confidence threshold to assign a source to a sample.

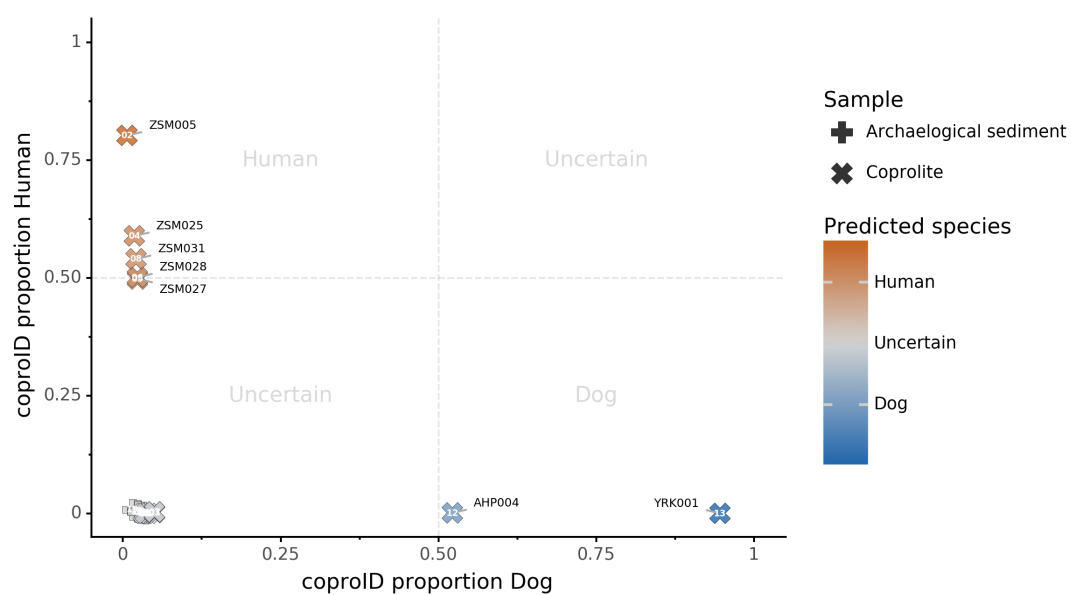

**Figure 8. coproID source prediction.**

Predicted human proportion graphed versus predicted canine proportion. Samples are colored by their predicted sources proportions. Samples with a low canine and human proportion are not annotated.



## 305 DISCUSSION

306 Paleofeces are the preserved remains of human or animal feces, and although they typically only preserve  
307 under highly particular conditions, they are nevertheless widely reported in the paleontological and  
308 archaeological records and include specimens ranging in age from the Paleozoic era (Dentzien-Dias et al.,  
309 2013) to the last few centuries. Paleofeces can provide unprecedented insights into animal health and  
310 diet, parasite biology and evolution, and the changing ecology and evolution of the gut microbiome.  
311 However, because many paleofeces lack distinctive morphological features, determining the host origin of  
312 a paleofeces can be a difficult problem (Poinar et al., 2009). In particular, distinguishing human and canine  
313 paleofeces can be challenging because they are often similar in size and shape, they tend to co-occur  
314 at archaeological sites and in midden deposits, and humans and domesticated dogs tend to eat similar  
315 diets (Guiry, 2012). We developed coproID to aid in identifying the source organism of archaeological  
316 paleofeces and coprolites by applying a combined approach relying on both ancient host DNA content  
317 and gut microbiome composition.

318 coproID addresses several shortcomings of previous methods. First, we have included a DNA damage-  
319 filtering step that allows for the removal of potentially contaminating modern human DNA, which may  
320 otherwise skew host species assignment. We have additionally measured and accounted for significant  
321 differences in the mean proportion of host DNA found in dog and human feces, and we also accounted for  
322 differences in host genome size between humans and dogs when making quantitative comparisons of host  
323 DNA. Then, because animal DNA recovered from paleofeces may contain a mixture of host and dietary  
324 DNA, we also utilize gut microbiome compositional data to estimate host source. We show that humans  
325 and dogs have distinct gut microbiome compositions, and that their feces can be accurately distinguished  
326 from each other and from non-feces using a machine learning classifier after data dimensionality reduction.  
327 Taken together, these approaches allow a robust determination of paleofeces and coprolite host source, that  
328 takes into account both modern contamination, microbiome composition, and postmortem degradation.

329 In applying coproID to a set of 20 archaeological samples of known and/or suspected origin, all  
330 7 non-fecal sediment samples were accurately classified as "uncertain" and were grouped with soil  
331 by Sourcepredict. For the 13 paleofeces and coprolites under study, 7 exhibited matching host and  
332 microbiome source assignments and were confidently classified as either human (n=5) or canine (n=2).  
333 Importantly, one of the samples confidently identified as canine was YRK001, a paleofeces that had been  
334 recovered from an archaeological chamber pot in the United Kingdom, but which showed an unusual  
335 diversity of parasites inconsistent with human feces, and therefore posed issues in host assignment.

336 For the remaining six unidentified paleofeces, three exhibited poor microbiome preservation and were  
337 classified as "uncertain", while the other three were well-preserved but yielded conflicting host DNA  
338 and microbiome assignments. These three samples, ZSM002, Z023, and ZSM029, all from prehistoric  
339 Mexico, all contain high levels of canine DNA, but have gut microbiome profiles within the range of  
340 NWHR humans. Classified as "uncertain", there are two possible explanations for these samples. First,  
341 these feces could have originated from a human who consumed a recent meal of canine meat. Dogs  
342 were consumed in ancient Mesoamerica (Clutton-Brock and Hammond, 1994; Santley and Rose, 1979;  
343 Rosenswig, 2007; Wing, 1978), but further research on the expected proportion of dietary DNA in human  
344 feces is needed to determine whether this is a plausible explanation for the very high amounts of canine  
345 DNA (and negligible amounts of human DNA) observed.

346 Alternatively, these feces could have originated from a canine whose microbiome composition is  
347 shifted relative to that of the reference metagenomes used in our training set. It is now well-established  
348 that subsistence mode strongly influences gut microbiome composition in humans Obregon-Tito et al.  
349 (2015), with NWHR and WHU human populations largely exhibiting distinct gut microbiome structure,  
350 as seen in (Figure 5a. To date, no gut microbiome data is available from non-Westernized dogs, and all  
351 reference dog metagenome data included as training data for coproID originated from a single study of  
352 labrador retrievers and beagles Coelho et al. (2018). Future studies of non-Westernized rural dogs are  
353 needed to establish the full range of gut microbial diversity in dogs and to more accurately model dog gut  
354 microbiome diversity in the past. Given that all confirmed human paleofeces in this study falls within  
355 the NWHR cluster (Figure 6), we anticipate that our ability to accurately classify dog paleofeces and  
356 coprolites as canine (as opposed to "uncertain") will improve with the future addition of non-Westernized  
357 rural dog metagenomic data.

## 358 CONCLUSIONS

359 We developed an open-source, documented, tested, scalable, and reproducible method to perform the  
360 identification of archaeological paleofeces and coprolite source. By leveraging the information from  
361 host DNA and microbiome composition, we were able to identify and/or confirm the source of newly  
362 sequenced paleofeces. We demonstrated that coproID can provide useful assistance to archaeologists in  
363 identifying authentic paleofeces and inferring their host. Future work on dog gut microbiome diversity,  
364 especially among rural, non-Westernized dogs, may help improve the tool's sensitivity even further.

## 365 ACKNOWLEDGMENTS

366 We thank David Petts, Zdeněk Tvrdý, Susanne Stegmann-Rajtár, and Zuzana Rajtarova for contributing  
367 archaeological samples to this study. We thank the Guildford Museum (Guildford Borough Council  
368 Heritage Service) and Catriona Wilson for allowing us to analyze the chamber pot paleofeces sample from  
369 Surrey, UK. The sample from Derragh, Ireland was excavated by Discovery Programme, an all-Ireland  
370 public center of archaeological research supported by the Heritage Council, during field work in 2003 to  
371 2005 as part of the Lake Settlement Project. Thanks to the Servei d'Investigació Prehistòrica of València  
372 and Museu de la Valltorta of Catelló for access to material. This work was supported by the US National  
373 Institutes of Health R01GM089886 (to C.W. and C.M.L.), the Deutsche Forschungsgemeinschaft EXC  
374 2051 #390713860 (to C.W.), and the Max Planck Society. Author contributions were as follows: M.B.  
375 and C.W. designed the research. B.C., M.C.W., D.J., C.A.H., and R.W.H. performed the laboratory  
376 experiments. M.B., C.J., M.C.W. and T.H. analyzed the data. M.B. developed the bioinformatics tools  
377 and pipelines. C.W., K.R., K.B., L.G.F., A.P., A.K., W.T.J.K., R.P., I.S., D.S.G., J.Y., T.S.K., N.M., H.C.,  
378 and C.M.L. provided materials and resources. C.W., A.He., and A.Hü. supervised the research. M.B.  
379 wrote the article, with input from C.W., A.Hü., KR and the other co-authors.

## 380 DATA AND CODE AVAILABILITY

381 Genetic data are available in the European Nucleotide Archive (ENA) under the accessions PRJEB33577  
382 and PRJEB35362. The code for the analysis is available at [github.com/maxibor/coproid-article](https://github.com/maxibor/coproid-article).

## 383 REFERENCES

- 384 Andrews, S. et al. (2010). Fastqc: a quality control tool for high throughput sequence data.  
385 Bon, C., Berthonaud, V., Maksud, F., Labadie, K., Poulain, J., Artiguenave, F., Wincker, P., Aury, J.-M.,  
386 and Elalouf, J.-M. (2012). Coprolites as a source of information on the genome and diet of the cave  
387 hyena. *Proceedings of the Royal Society B: Biological Sciences*, 279(1739):2825–2830.  
388 Borry, M. (2019a). maxibor/anonymap: Anonymap v1.0.  
389 Borry, M. (2019b). Sourcepredict: Prediction of metagenomic sample sources using dimension reduction  
390 followed by machine learning classification. *Journal of Open Source Software*, 4(41):1540.  
391 Briggs, A. W., Stenzel, U., Johnson, P. L. F., Green, R. E., Kelso, J., Prüfer, K., Meyer, M., Krause, J.,  
392 Ronan, M. T., Lachmann, M., and Pääbo, S. (2007). Patterns of damage in genomic DNA sequences  
393 from a Neandertal. *Proceedings of the National Academy of Sciences*, 104(37):14616–14621.  
394 Brito, I. L., Gurry, T., Zhao, S., Huang, K., Young, S. K., Shea, T. P., Naisilisili, W., Jenkins, A. P., Jupiter,  
395 S. D., Gevers, D., and Alm, E. J. (2019). Transmission of human-associated microbiota along family  
396 and social networks. *Nature Microbiology*, page 1.  
397 Butler, J. and Du Toit, J. (2002). Diet of free-ranging domestic dogs (*canis familiaris*) in rural zimbabwe:  
398 implications for wild scavengers on the periphery of wildlife reserves. In *Animal Conservation forum*,  
399 volume 5, pages 29–37. Cambridge University Press.  
400 Clutton-Brock, J. and Hammond, N. (1994). Hot dogs: comestible canids in preclassic maya culture at  
401 cuello, belize. *Journal of Archaeological Science*, 21(6):819–826.  
402 Coelho, L. P., Kultima, J. R., Costea, P. I., Fournier, C., Pan, Y., Czarnecki-Maulden, G., Hayward, M. R.,  
403 Forslund, S. K., Schmidt, T. S. B., Descombes, P., Jackson, J. R., Li, Q., and Bork, P. (2018). Similarity  
404 of the dog and human gut microbiomes in gene content and response to diet. *Microbiome*, 6(1):72.  
405 CSIR, C. i. o. m. and aromatic plants (2016). *Chrysopogon zizanioides* (ID 322597) - BioProject - NCBI.  
406 Dabney, J., Knapp, M., Glocke, I., Gansauge, M.-T., Weihmann, A., Nickel, B., Valdiosera, C., García,  
407 N., Pääbo, S., Arsuaga, J.-L., et al. (2013). Complete mitochondrial genome sequence of a middle

- 408 pleistocene cave bear reconstructed from ultrashort dna fragments. *Proceedings of the National*  
409 *Academy of Sciences*, 110(39):15758–15763.
- 410 Davenport, E. R., Sanders, J. G., Song, S. J., Amato, K. R., Clark, A. G., and Knight, R. (2017). The  
411 human microbiome in evolution. *BMC Biology*, 15(1):127.
- 412 Dentzien-Dias, P. C., Poinar Jr, G., de Figueiredo, A. E. Q., Pacheco, A. C. L., Horn, B. L., and Schultz,  
413 C. L. (2013). Tapeworm eggs in a 270 million-year-old shark coprolite. *PLoS One*, 8(1):e55007.
- 414 Dhakan, D. B., Maji, A., Sharma, A. K., Saxena, R., Pulikkan, J., Grace, T., Gomez, A., Scaria, J., Amato,  
415 K. R., and Sharma, V. K. (2019). The unique composition of Indian gut microbiome, gene catalogue,  
416 and associated fecal metabolome deciphered using multi-omics approaches. *GigaScience*, 8(3).
- 417 Di Tommaso, P., Chatzou, M., Floden, E. W., Barja, P. P., Palumbo, E., and Notredame, C. (2017).  
418 Nextflow enables reproducible computational workflows. *Nature biotechnology*, 35(4):316.
- 419 Ewels, P., Peltzer, A., Fillinger, S., Alneberg, J., Patel, H., Wilm, A., Garcia, M., Di Tommaso, P., and  
420 Nahnsen, S. (2019). nf-core: Community curated bioinformatics pipelines. *bioRxiv*, page 610741.
- 421 Fierer, N., Leff, J. W., Adams, B. J., Nielsen, U. N., Bates, S. T., Lauber, C. L., Owens, S., Gilbert,  
422 J. A., Wall, D. H., and Caporaso, J. G. (2012). Cross-biome metagenomic analyses of soil micro-  
423 bial communities and their functional attributes. *Proceedings of the National Academy of Sciences*,  
424 109(52):21390–21395.
- 425 Frantz, L. A., Mullin, V. E., Pionnier-Capitan, M., Lebrasseur, O., Ollivier, M., Perri, A., Linderholm,  
426 A., Mattiangeli, V., Teasdale, M. D., Dimopoulos, E. A., et al. (2016). Genomic and archaeological  
427 evidence suggest a dual origin of domestic dogs. *Science*, 352(6290):1228–1231.
- 428 Gilbert, M. T. P., Jenkins, D. L., Götherstrom, A., Naveran, N., Sanchez, J. J., Hofreiter, M., Thomsen,  
429 P. F., Binladen, J., Higham, T. F., Yohe, R. M., et al. (2008). Dna from pre-clovis human coprolites in  
430 oregon, north america. *Science*, 320(5877):786–789.
- 431 Guiry, E. J. (2012). Dogs as analogs in stable isotope-based human paleodietary reconstructions: a review  
432 and considerations for future use. *Journal of Archaeological Method and Theory*, 19(3):351–376.
- 433 Hagan, R. W., Hofman, C. A., Hübner, A., Reinhard, K., Schnorr, S., Lewis, C. M., Sankaranarayanan,  
434 K., and Warinner, C. G. (2019). Comparison of extraction methods for recovering ancient microbial  
435 dna from paleofeces. *American Journal of Physical Anthropology*.
- 436 Hofreiter, M., Poinar, H. N., Spaulding, W. G., Bauer, K., Martin, P. S., Possnert, G., and Pääbo, S.  
437 (2000). A molecular analysis of ground sloth diet through the last glaciation. *Molecular Ecology*,  
438 9(12):1975–1984.
- 439 Huttenhower, C., Gevers, D., Knight, R., Abubucker, S., Badger, J. H., Chinwalla, A. T., Creasy, H. H.,  
440 Earl, A. M., FitzGerald, M. G., Fulton, R. S., et al. (2012). Structure, function and diversity of the  
441 healthy human microbiome. *nature*, 486(7402):207.
- 442 Jiménez, F. A., Gardner, S. L., Araújo, A., Fugassa, M., Brooks, R. H., Racz, E., and Reinhard, K. J.  
443 (2012). Zoonotic and human parasites of inhabitants of cueva de los muertos chiquitos, rio zape valley,  
444 durango, mexico. *Journal of Parasitology*, 98(2):304–310.
- 445 Kho, Z. Y. and Lal, S. K. (2018). The human gut microbiome—a potential controller of wellness and  
446 disease. *Frontiers in microbiology*, 9.
- 447 Kirch, P. and O’Day, S. J. (2003). New archaeological insights into food and status: a case study from  
448 pre-contact hawaii. *World Archaeology*, 34(3):484–497.
- 449 Knights, D., Kuczynski, J., Charlson, E. S., Zaneveld, J., Mozer, M. C., Collman, R. G., Bushman, F. D.,  
450 Knight, R., and Kelley, S. T. (2011). Bayesian community-wide culture-independent microbial source  
451 tracking. *Nature Methods*, 8(9):761–763.
- 452 Langmead, B. and Salzberg, S. L. (2012). Fast gapped-read alignment with bowtie 2. *Nature methods*,  
453 9(4):357.
- 454 Ley, R. E., Hamady, M., Lozupone, C., Turnbaugh, P. J., Ramey, R. R., Bircher, J. S., Schlegel, M. L.,  
455 Tucker, T. A., Schrenzel, M. D., Knight, R., et al. (2008). Evolution of mammals and their gut microbes.  
456 *Science*, 320(5883):1647–1651.
- 457 Mann, A. E., Sabin, S., Ziesemer, K., Vågane, Å. J., Schroeder, H., Ozga, A. T., Sankaranarayanan,  
458 K., Hofman, C. A., Yates, J. A. F., Salazar-García, D. C., et al. (2018). Differential preservation of  
459 endogenous human and microbial dna in dental calculus and dentin. *Scientific reports*, 8(1):9822.
- 460 Meyer, M. and Kircher, M. (2010). Illumina sequencing library preparation for highly multiplexed target  
461 capture and sequencing. *Cold Spring Harbor Protocols*, 2010(6):pdb-prot5448.
- 462 Obregon-Tito, A. J., Tito, R. Y., Metcalf, J., Sankaranarayanan, K., Clemente, J. C., Ursell, L. K.,

- 463 Zech Xu, Z., Van Treuren, W., Knight, R., Gaffney, P. M., Spicer, P., Lawson, P., Marin-Reyes, L.,  
464 Trujillo-Villarroel, O., Foster, M., Guija-Poma, E., Troncoso-Corzo, L., Warinner, C., Ozga, A. T., and  
465 Lewis, C. M. (2015). Subsistence strategies in traditional societies distinguish gut microbiomes. *Nature*  
466 *Communications*, 6:6505.
- 467 Orellana, L. H., Chee-Sanford, J. C., Sanford, R. A., Löffler, F. E., and Konstantinidis, K. T. (2018).  
468 Year-Round Shotgun Metagenomes Reveal Stable Microbial Communities in Agricultural Soils and  
469 Novel Ammonia Oxidizers Responding to Fertilization. *Applied and Environmental Microbiology*,  
470 84(2):e01646–17.
- 471 Pasolli, E., Asnicar, F., Manara, S., Zolfo, M., Karcher, N., Armanini, F., Beghini, F., Manghi, P., Tett,  
472 A., Ghensi, P., Collado, M. C., Rice, B. L., DuLong, C., Morgan, X. C., Golden, C. D., Quince,  
473 C., Huttenhower, C., and Segata, N. (2019). Extensive Unexplored Human Microbiome Diversity  
474 Revealed by Over 150,000 Genomes from Metagenomes Spanning Age, Geography, and Lifestyle.  
475 *Cell*, 176(3):649–662.e20.
- 476 Peltzer, A. and Neukamm, J. (2019). Integrative-Transcriptomics/DamageProfiler: DamageProfiler v0.4.7.
- 477 Podberscek, A. L. (2009). Good to pet and eat: The keeping and consuming of dogs and cats in south  
478 korea. *Journal of Social Issues*, 65(3):615–632.
- 479 Poinar, H., Fiedel, S., King, C. E., Devault, A. M., Bos, K., Kuch, M., and Debruyne, R. (2009). Comment  
480 on “dna from pre-clovis human coprolites in oregon, north america”. *Science*, 325(5937):148–148.
- 481 Poinar, H. N., Hofreiter, M., Spaulding, W. G., Martin, P. S., Stankiewicz, B. A., Bland, H., Evershed,  
482 R. P., Possnert, G., and Pääbo, S. (1998). Molecular coproscopy: dung and diet of the extinct ground  
483 sloth *nothrotheriops shastensis*. *Science*, 281(5375):402–406.
- 484 Poinar, H. N., Kuch, M., Sobolik, K. D., Barnes, I., Stankiewicz, A. B., Kuder, T., Spaulding, W. G.,  
485 Bryant, V. M., Cooper, A., and Pääbo, S. (2001). A molecular analysis of dietary diversity for three  
486 archaic native americans. *Proceedings of the National Academy of Sciences*, 98(8):4317–4322.
- 487 pysam developers (2018). Pysam: a python module for reading and manipulating files in the sam/bam  
488 format.
- 489 Rampelli, S., Schnorr, S., Consolandi, C., Turroni, S., Severgnini, M., Peano, C., Brigidi, P., Crittenden,  
490 A., Henry, A., and Candela, M. (2015). Metagenome Sequencing of the Hadza Hunter-Gatherer Gut  
491 Microbiota. *Current Biology*, 25(13):1682–1693.
- 492 Rohland, N., Harney, E., Mallick, S., Nordenfelt, S., and Reich, D. (2015). Partial uracil–dna–glycosylase  
493 treatment for screening of ancient dna. *Philosophical Transactions of the Royal Society B: Biological*  
494 *Sciences*, 370(1660):20130624.
- 495 Rosenswig, R. M. (2007). Beyond identifying elites: Feasting as a means to understand early middle  
496 formative society on the pacific coast of mexico. *Journal of Anthropological Archaeology*, 26(1):1–27.
- 497 Santley, R. S. and Rose, E. K. (1979). Diet, nutrition and population dynamics in the basin of mexico.  
498 *World Archaeology*, 11(2):185–207.
- 499 Schubert, M., Lindgreen, S., and Orlando, L. (2016). Adapterremoval v2: rapid adapter trimming,  
500 identification, and read merging. *BMC research notes*, 9(1):88.
- 501 Sharpton, T. J. (2014). An introduction to the analysis of shotgun metagenomic data. *Frontiers in plant*  
502 *science*, 5:209.
- 503 Shenhav, L., Thompson, M., Joseph, T. A., Briscoe, L., Furman, O., Bogumil, D., Mizrahi, I., Pe’er, I.,  
504 and Halperin, E. (2019). FEAST: fast expectation-maximization for microbial source tracking. *Nature*  
505 *Methods*, page 1.
- 506 Sistiaga, A., Mallol, C., Galván, B., and Summons, R. E. (2014). The neanderthal meal: a new perspective  
507 using faecal biomarkers. *PLoS one*, 9(6):e101045.
- 508 Skoglund, P., Northoff, B. H., Shunkov, M. V., Derevianko, A. P., Pääbo, S., Krause, J., and Jakobsson, M.  
509 (2014). Separating endogenous ancient DNA from modern day contamination in a Siberian Neandertal.  
510 *Proceedings of the National Academy of Sciences*, 111(6):2229–2234.
- 511 The Human Microbiome Project Consortium, Huttenhower, C., Gevers, D., Knight, Rob, W. O., et al.  
512 (2012). Structure, function and diversity of the healthy human microbiome. *Nature*, 486(7402):207–214.
- 513 Tito, R. Y., Knights, D., Metcalf, J., Obregon-Tito, A. J., Cleeland, L., Najar, F., Roe, B., Reinhard, K.,  
514 Sobolik, K., Belknap, S., Foster, M., Spicer, P., Knight, R., and Lewis, C. M. (2012). Insights from  
515 Characterizing Extinct Human Gut Microbiomes. *PLoS ONE*, 7(12):e51146.
- 516 Tito, R. Y., Macmil, S., Wiley, G., Najar, F., Cleeland, L., Qu, C., Wang, P., Romagne, F., Leonard, S.,  
517 Ruiz, A. J., et al. (2008). Phylotyping and functional analysis of two ancient human microbiomes.

- 518 *PLoS One*, 3(11):e3703.
- 519 Warinner, C., Herbig, A., Mann, A., Fellows Yates, J. A., Weiß, C. L., Burbano, H. A., Orlando, L., and  
520 Krause, J. (2017). A robust framework for microbial archaeology. *Annual review of genomics and*  
521 *human genetics*, 18:321–356.
- 522 Warinner, C. and Lewis Jr, C. M. (2015). Microbiome and health in past and present human populations.  
523 *American Anthropologist*, 117(4):740–741.
- 524 Warinner, C., Speller, C., Collins, M. J., and Lewis Jr, C. M. (2015). Ancient human microbiomes.  
525 *Journal of human evolution*, 79:125–136.
- 526 Wing, E. S. (1978). *Use of dogs for food: An adaptation to the coastal environment*. Elsevier.
- 527 Wood, D. E. and Salzberg, S. L. (2014). Kraken: ultrafast metagenomic sequence classification using  
528 exact alignments. *Genome biology*, 15(3):R46.
- 529 Wood, J. R., Crown, A., Cole, T. L., and Wilmshurst, J. M. (2016). Microscopic and ancient dna profiling  
530 of polynesian dog (kuri) coprolites from northern new zealand. *Journal of Archaeological Science:*  
531 *Reports*, 6:496–505.
